# Supplementary material
Source: publisher figshare collection journal article supplement (https://acs.figshare.com/ndownloader/files/12750065)
Supplement: Supplementary file 1 [file 12750065]

## Supporting Information

# Distorted Janus Transition Metal Dichalcogenides: Stable Two Dimensional Materials with Sizable Band Gap and Ultrahigh Carrier Mobility

Xiao Tang<sup>1</sup>, Shengshi Li<sup>2</sup>, Yandong Ma<sup>2</sup>, Aijun Du<sup>1</sup>, Ting Liao<sup>1</sup>, Yuantong Gu<sup>1</sup>, Liangzhi Kou<sup>1\*</sup>

<sup>1</sup>*School of Chemistry, Physics and Mechanical Engineering, Science and Engineering Faculty, Queensland University of Technology, Gardens Point Campus, Brisbane, QLD 4001, Australia*

<sup>2</sup>*School of Physics, State Key Laboratory of Crystal Materials, Shandong University, Shandan Str. 27, 250100 Jinan, People's Republic of China*

[Liangzhi.kou@qut.edu.au](mailto:Liangzhi.kou@qut.edu.au)

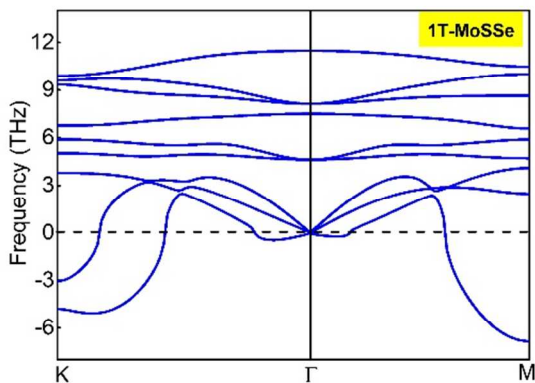

Figure S1. Phonon dispersion of 1T-MoSSe.

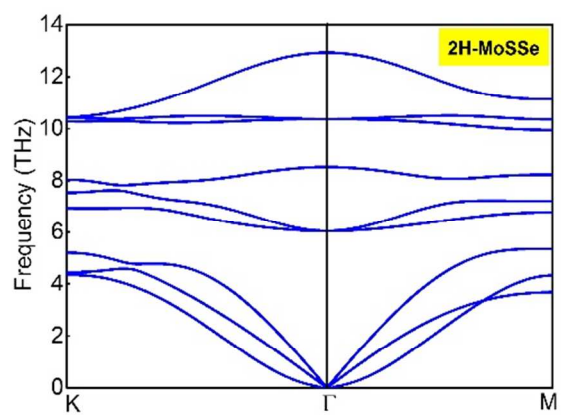

Figure S2. Phonon dispersion of 2H-MoSSe.

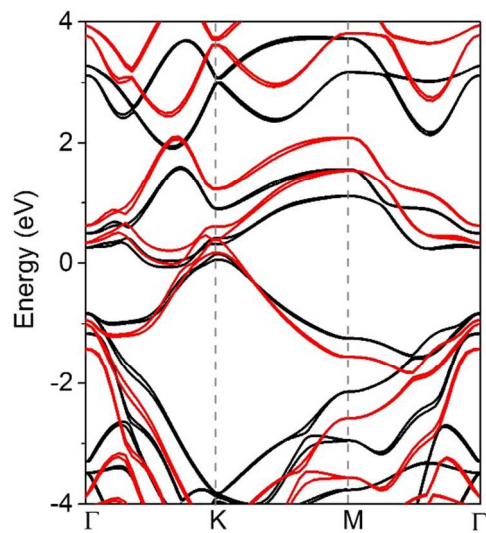

Figure S3. Band structure calculated by PBE( black line) and HSE06 (red line) functionals of 1T-MoSSe. The Fermi level was set to zero.

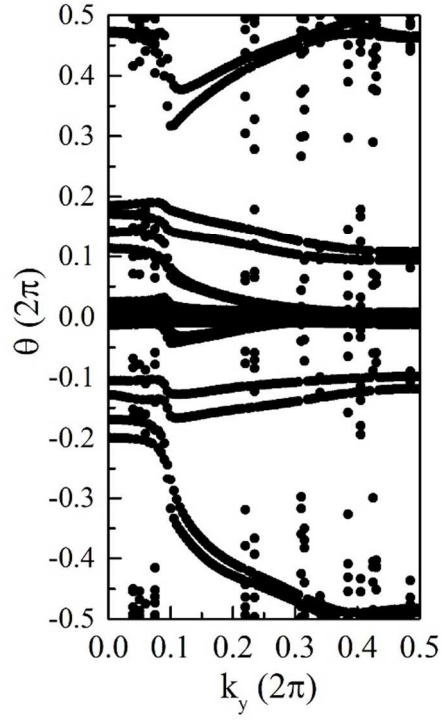

Figure S4.  $Z_2$  index for free standing 1T' MoSSe, it can be seen that the distorted Janus TMD is a trivial semiconductor.

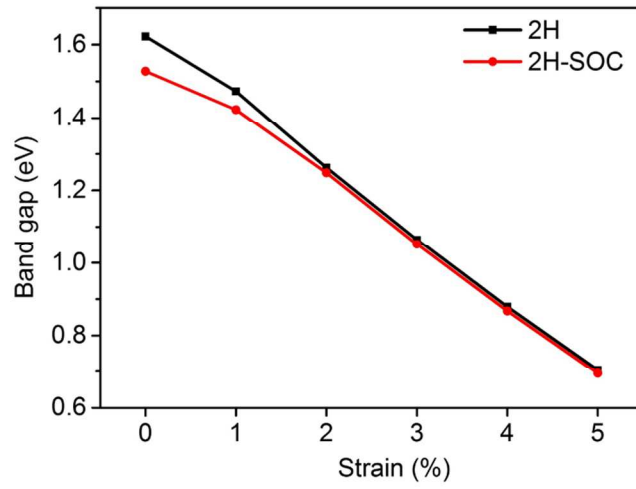

Figure S5. Calculated band gap of 2H-MoSSe as a function of applied strain.

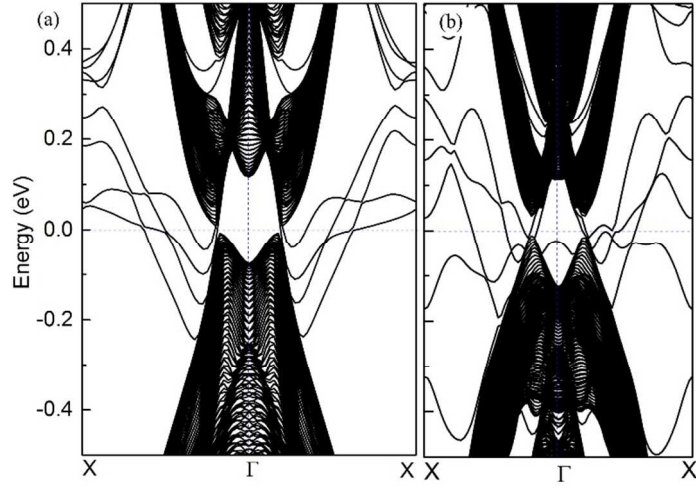

Figure S6. The calculated edge states for 1T'-MoSSe at strain of (a) 0% and (b) 3%.

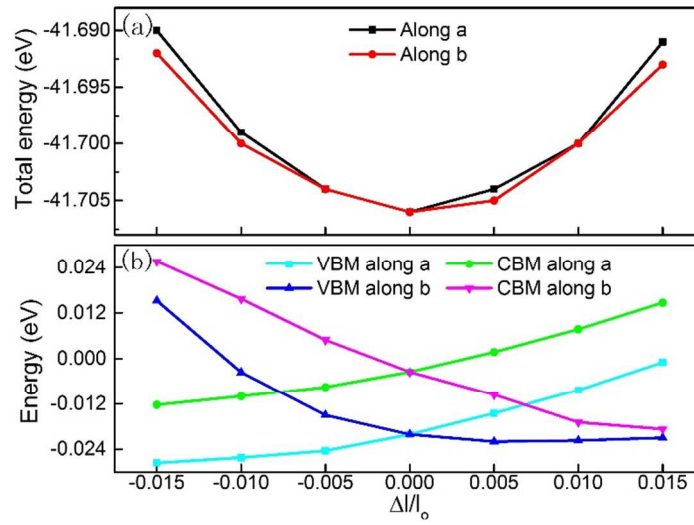

Figure S7. (a) Total energy variation under strain deformation. (b) VBM and CBM energies as a function of applied strain, for carrier mobility calculations.

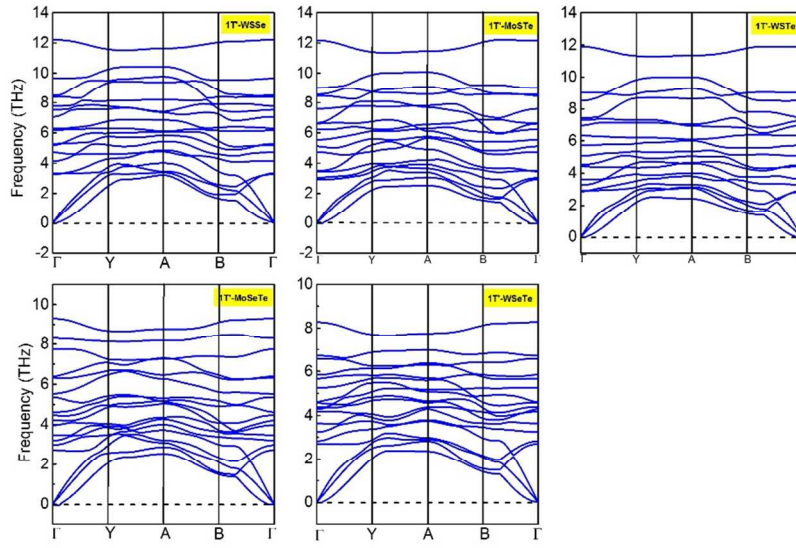

Figure S8. Phonon dispersion curves of Janus 1T'-MX monolayer. The absence of imaginary frequency presents the structural ability of all 1T'-MX monolayer.

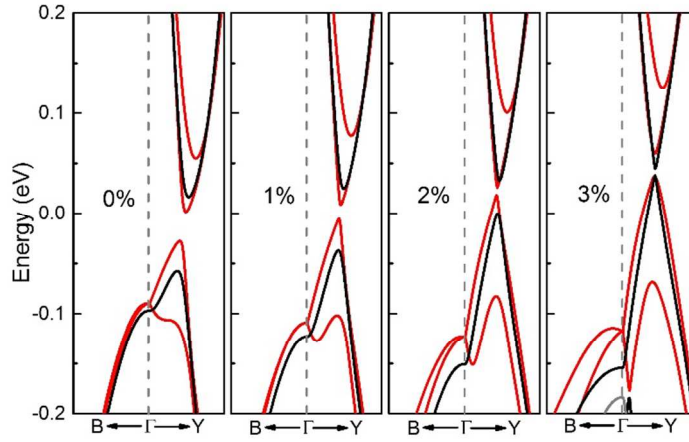

Figure S9. Zoomed band structures of 1T'-WSSe near  $\Gamma$  point under different strain deformation with (red solid line) and without (black solid line) spin-orbital coupling. The Fermi level was set to zero.

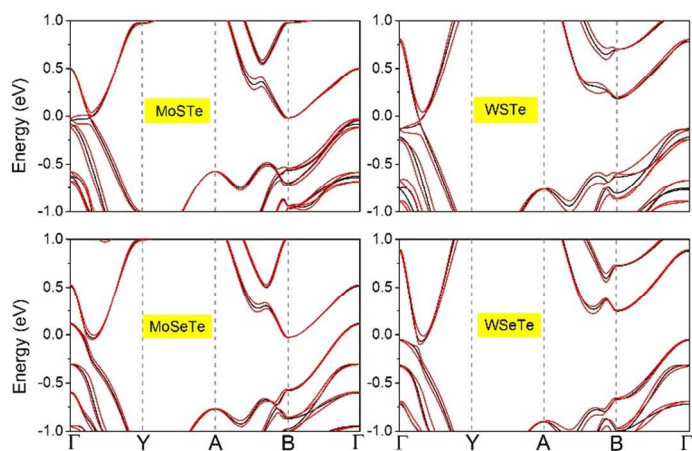

Figure S10. Band structures with (red solid line) and without (black solid line) spin-orbital coupling of other 1T'-MXY monolayer. The Fermi level was set to zero.

Table S1. Band gaps of 1T'-MXY, calculated by HSE06 method including spin-orbit coupling effect (HSE-SOC)

|               | WSSe | MoSTe | WSTe | MoSeTe | WSeTe |
|---------------|------|-------|------|--------|-------|
| Band gap (eV) | 0.09 | 0.08  | 0.05 | -      | 0.05  |

The “-” sign in the table means there is no gap, it is a metal
